# Supplementary material for: Mortality among blood donors seropositive and seronegative for Chagas disease (1996–2000) in São Paulo, Brazil: A death certificate linkage study
Source: PLoS Negl Trop Dis. 2017 May 18;11(5):e0005542. doi: 10.1371/journal.pntd.0005542 (PMC5436632; doi:10.1371/journal.pntd.0005542)
Supplement: S1 Table — (XLSX) [file pntd.0005542.s001.xlsx]

## Sheet: S1 - Table
ICD-10	Description - Basic Cause of Death	Seropositive	Seronegative	p-value
		N=159	N=103
		n (%)	n (%)
	Chapter I - Certain infectious and parasitic diseases	32	3	<0.001
A16.2	Tuberculosis of lung, without mention of bacteriological or histological confirmation	2	1
B20.7	HIV disease resulting in multiple infections	1	2
B20.8	HIV disease resulting in other infectious and parasitic diseases	1	0
B22.2	HIV disease resulting in wasting syndrome	1	0
B56.9	African trypanosomiasis, unspecified	1	0
B57.2	Chagas disease (chronic) with heart involvement	22	0
B57.3	Chagas disease (chronic) with digestive system involvement	3	0
B57.4	Chagas disease (chronic) with nervous system involvement	1	0
	Chapter II - Neoplasms	22	17	0.553
C15.9	Malignant neoplasm: Oesophagus, unspecified	1	0
C16.9	Malignant neoplasm: Stomach, unspecified	4	2
C18.9	Malignant neoplasm: Colon, unspecified	0	1
C20	Malignant neoplasm of rectum	0	1
C25.0	Malignant neoplasm: Head of pancreas	1	0
C25.9	Malignant neoplasm: Pancreas, unspecified	4	2
C32.9	Malignant neoplasm: Larynx, unspecified	0	1
C34.9	Malignant neoplasm: Bronchus or lung, unspecified	2	2
C43.9	Malignant neoplasm: Malignant melanoma of skin, unspecified	0	2
C44.9	Malignant neoplasm: Malignant neoplasm of skin, unspecified	1	0
C50.9	Malignant neoplasm: Breast, unspecified	1	3
C53.9	Malignant neoplasm: Cervix uteri, unspecified	2	0
C61	Malignant neoplasm of prostate	1	0
C76.0	Malignant neoplasm of other and ill-defined sites: Head, face and neck	0	1
C80	Malignant neoplasm, without specification of site	1	0
C85.9	Non-Hodgkin lymphoma, unspecified	1	1
C90.0	Multiple myeloma	1	1
C97	Malignant neoplasms of independent (primary) multiple sites	1	0
D37.1	Neoplasm of uncertain or unknown behaviour: Stomach	1	0
	Chapter IV - Endocrine, nutritional and metabolic diseases	0	2	0.078
E14.9	Unspecified diabetes mellitus without complication	0	2
	Chapter V - Mental and behavioural disorders	1	0	0.420
F10.2	Mental and behavioural disorders due to use of alcohol : dependence syndrome	1	0
	Chapter VI - Diseases of the nervous system	0	1	0.213
G06.2	Extradural and subdural abscess, unspecified	0	1
	Chapter IX - Diseases of the circulatory system	58	20	0.003
I10	Essential (primary) hypertension	1	0
I11.0	Hypertensive heart disease with (congestive) heart failure	1	1
I11.9	Hypertensive heart disease without (congestive) heart failure	3	0
I21.0	Acute transmural myocardial infarction of anterior wall	1	0
I21.9	Acute myocardial infarction, unspecified	23	11
I24.8	Other forms of acute ischaemic heart disease	1	0
I25.1	Atherosclerotic heart disease	2	0
I25.9	Chronic ischaemic heart disease, unspecified	3	0
I34.0	Nonrheumatic mitral valve disorders	0	1
I42.0	Dilated cardiomyopathy	5	1
I42.9	Cardiomyopathy, unspecified	1	0
I44.3	Other and unspecified atrioventricular block	1	0
I50.0	Congestive heart failure	1	0
I51.4	Myocarditis, unspecified	1	0
I51.7	Cardiomegaly	3	0
I60.8	Other subarachnoid haemorrhage	0	1
I61.9	Intracerebral haemorrhage, unspecified	2	2
I63.9	Cerebral infarction, unspecified	0	1
I64	Stroke, not specified as haemorrhage or infarction	2	0
I67.8	Other specified cerebrovascular diseases	2	0
I69.3	Sequelae of cerebral infarction	1	0
I69.8	Sequelae of other and unspecified cerebrovascular diseases	1	0
I71.3	Abdominal aortic aneurysm, ruptured	0	1
I71.8	Aortic aneurysm of unspecified site, ruptured	2	0
I80.2	Phlebitis and thrombophlebitis of other deep vessels of lower extremities	1	1
	Chapter X - Diseases of the respiratory system	9	2	0.148
J18.0	Bronchopneumonia, unspecified	1	1
J18.9	Pneumonia, unspecified	1	0
J44.0	Chronic obstructive pulmonary disease with acute lower respiratory infection	1	0
J69.0	Pneumonitis due to food and vomit	3	0
J81	Pulmonary oedema	2	0
J90	Pleural effusion, not elsewhere classified	1	1
	Chapter XI - Diseases of the digestive system	8	8	0.366
K25.6	Gastric ulcer : chronic or unspecified with both haemorrhage and perforation	0	1
K26.5	Duodenal ulcer : chronic or unspecified with perforation	0	1
K55.0	Acute vascular disorders of intestine	0	1
K55.9	Acute vascular disorders of intestine	0	1
K56.2	Volvulus	1	0
K65.0	Acute peritonitis	0	1
K65.9	Peritonitis, unspecified	0	1
K70.3	Alcoholic cirrhosis of liver	1	0
K74.6	Other and unspecified cirrhosis of liver	4	2
K81.0	Acute cholecystitis	1	0
K85	Acute pancreatitis	1	0
	Chapter XIV - Diseases of the genitourinary system	2	0	0.253
N12	Tubulo-interstitial nephritis, not specified as acute or chronic	1	0
N19	Unspecified kidney failure	1	0
	Chapter XVII - Congenital malformations, deformations and chromosomal abnormalities	0	1	0.213
Q27.4	Congenital phlebectasia	0	1
	Chapter XVIII - Symptoms, signs and abnormal clinical and laboratory findings, not elsewhere classified	9	8	0.499
R57.1	Hypovolaemic shock	1	0
R68.8	Other specified general symptoms and signs	0	1
R98	Unattended death	3	1
R99	Other ill-defined and unspecified causes of mortality	5	6
	Chapter XX - External causes of morbidity and mortality	18	41	<0.001
V05.0	Pedestrian injured in collision with railway train or railway vehicle : nontraffic accident	0	1
V09.3	Pedestrian injured in unspecified traffic accident	0	3
V27.4	Motorcycle rider injured in collision with fixed or stationary object : driver injured in traffic accident	1	2
V28.4	Motorcycle rider injured in noncollision transport accident : driver injured in traffic accident	0	1
V29.9	Motorcycle rider [any] injured in unspecified traffic accident	1	1
V89.2	Person injured in unspecified motor-vehicle accident, traffic	2	2
V89.9	Person injured in unspecified vehicle accident	0	1
W11.9	Fall on and from ladder - unespecified place	0	1
W19.9	Unspecified fall - unespecified place	1	1
W74.9	Unspecified drowning and submersion, unespecified place	1	0
X09.4	Exposure to unspecified smoke, fire and flames	0	1
X68.0	Intentional self-poisoning by and exposure to pesticides	1	0
X70.0	Intentional self-harm by hanging, strangulation and suffocation, home	1	1
X70.9	Intentional self-harm by hanging, strangulation and suffocation, unespecified place	1	0
X93.4	Assault by handgun discharge, street and highway	0	1
X95.0	Assault by other and unspecified firearm discharge, home	0	1
X95.4	Assault by other and unspecified firearm discharge, street and highway	2	6
X95.9	Assault by other and unspecified firearm discharge, unespecified place	1	5
X99.0	Assault by sharp object, home	0	1
X99.4	Assault by sharp object, street and highway	1	0
Y00.4	Assault by blunt object, street and highway	1	1
Y00.8	Assault by blunt object, Other specified places	0	1
Y04.9	Assault by bodily force, unespecified place	0	1
Y07.9	Other maltreatment syndromes, By unspecified person	0	1
Y09.0	Assault by unspecified means, home	0	1
Y09.4	Assault by unspecified means, street and highway	1	2
Y09.9	Assault by unspecified means, unespecified place	1	1
Y19.9	Poisoning by and exposure to other and unspecified chemicals and noxious substances, undetermined intent, unespecified place	0	1
Y29.9	Contact with blunt object, undetermined intent, unespecified place	0	1
Y34.0	Unspecified event, undetermined intent , home	0	1
Y34.4	Unspecified event, undetermined intent , street and highway	0	1
Y34.9	Unspecified event, undetermined intent , unespecified place	2	0
